# Supplementary material for: Comparison of Two Nuclear Magnetic Resonance Spectroscopy Methods for the Measurement of Lipoprotein Particle Concentrations
Source: MDPI journal article supplement (doi:10.3390/biomedicines10071766), 2022-07-21

# SUPPLEMENTAL MATERIALS

## Comparison of two Nuclear Magnetic Resonance Spectroscopy Methods for the Measurement of Lipoprotein Particle Concentrations

**Running Title: Comparison of two NMR Methods**

Martin Rief, MD<sup>1</sup> (martin.rief@medunigraz.at)

Reinhard Raggam, MD<sup>2</sup> (reinhard.raggam@medunigraz.at)

Peter Rief, MD PhD<sup>2</sup> (peter.rief@medunigraz.at)

Philipp Metnitz, Prof. MD PhD<sup>1</sup> (philipp.metnitz@medunigraz.at)

Tatjana Stojakovic, MD<sup>3</sup> (tatjana.stojakovic@uniklinikum.kages.at)

Markus Reinthaler, MD<sup>4</sup> (markus.reinthaler@charite.de)

Marianne Brodmann, Prof. MD<sup>2</sup> (marianne.brodmann@medunigraz.at)

Winfried März, Prof. MD<sup>3</sup> (winfried.maerz@medunigraz.at)

Hubert Scharnagl, Prof. PhD<sup>5</sup> \* (hubert.scharnagl@medunigraz.at)

Günther Silbernagel, Prof. MD PhD<sup>2</sup> (guenther.silbernagel@medunigraz.at)

<sup>1</sup> Division of General Anaesthesiology, Emergency- and Intensive Care Medicine, Medical University of Graz, Graz, Austria

<sup>2</sup> Division of Angiology, Department of Internal Medicine, Medical University of Graz, Graz, Austria

<sup>3</sup> Clinical Institute of Medical and Chemical Laboratory Diagnostics, University Hospital Graz Graz, Graz, Austria

<sup>4</sup> Charité-Universitätsmedizin Berlin (CBF) Berlin, Germany and Institute of Biomaterial Science, Helmholtz-Zentrum Geesthacht, Teltow, Germany

<sup>5</sup> Clinical Institute of Medical and Chemical Laboratory Diagnostics, Medical University of Graz, Graz, Austria

# Supplemental Table S1

**Title: Lipofit** values under the detection limit

(C= cholesterol. HDL= high density lipoproteins. LHDL= large high density lipoproteins . mg/dl= milligram per deciliter.  $\mu\text{mol/l}$ = micromoles per liter. nmol/l= nanomoles per liter. p= particles. SHDL= small high density lipoproteins . SLDL= small low density lipoproteins . TG= triglycerides)

| <i>Parameter</i> | <i>Value</i>            | <i>Quantity</i> |
|------------------|-------------------------|-----------------|
| <i>SLDL-p</i>    | <152 nmol/l             | 4               |
| <i>LHDL-p</i>    | <2780 $\mu\text{mol/l}$ | 32              |
| <i>SHDL-p</i>    | <6034 $\mu\text{mol/l}$ | 2               |
| <i>TG</i>        | <44 mg/dl               | 4               |
| <i>HDL-C</i>     | <17 mg/dl               | 1               |

## Supplemental Table S2

### Title: Additional analyses from lipoprofile

(<sup>a</sup> $p < 0.05$ . <sup>b</sup> $p < 0.01$ . <sup>c</sup> $p < 0.001$ . apoB= apolipoprotein B. C= cholesterol. HDL= high density lipoproteins. l= liter. LDL= low density lipoproteins. LHDl= large high density lipoproteins . LLDL= large low density lipoproteins. LVLVDL= large very low density lipoproteins. MHDl= medium high density lipoproteins. MLDL= medium low density lipoproteins. MVLVDL= medium very low density lipoproteins. p= particles. SHDL= small high density lipoproteins . SLDL= small low density lipoproteins . SVLVDL= small very low density lipoproteins . TC= total cholesterol. TG= triglycerides. VLDL= very low density lipoproteins. VLVLDL= very large very low density lipoproteins. VSVLVDL= small very low density lipoproteins)

| Lipoprofile | VLDL-p             | VLVDL-p            | LVDL-p             | MVDL-p             | SVLVDL-p          | VSVLVDL-p          | LDL-p              | LLDL-p             | MLDL-p             | SLDL-p             | HDL-p              | HDL-p H1           | HDL-p H2           | HDL-p H3           | HDL-p H4           | HDL-p H5           | HDL-p H6           | HDL-p H7           | LHDL-p             | MHDl-p             | SHDL-p             | TC                | TG                 | HDL-C              | LDL-C             | apoB              |
|-------------|--------------------|--------------------|--------------------|--------------------|-------------------|--------------------|--------------------|--------------------|--------------------|--------------------|--------------------|--------------------|--------------------|--------------------|--------------------|--------------------|--------------------|--------------------|--------------------|--------------------|--------------------|-------------------|--------------------|--------------------|-------------------|-------------------|
| VLDL-p      | 1                  | 0.16               | 0.47 <sup>c</sup>  | 0.57 <sup>c</sup>  | 0.59 <sup>c</sup> | 0.69 <sup>c</sup>  | 0.53 <sup>c</sup>  | 0.19 <sup>a</sup>  | 0.42 <sup>c</sup>  | 0.17 <sup>a</sup>  | -0.02              | -0.12              | 0.13               | 0.19 <sup>a</sup>  | -0.18 <sup>a</sup> | -0.27 <sup>c</sup> | 0.09               | -0.38 <sup>c</sup> | -0.23 <sup>b</sup> | 0.03               | 0.03               | 0.6 <sup>c</sup>  | 0.59 <sup>c</sup>  | -0.25 <sup>b</sup> | 0.59 <sup>c</sup> | 0.6 <sup>c</sup>  |
| VLVDL-p     | 0.16               | 1                  | 0.54 <sup>c</sup>  | 0.39 <sup>c</sup>  | -0.11             | 0.17 <sup>a</sup>  | 0.05               | -0.32 <sup>c</sup> | 0.07               | 0.29 <sup>c</sup>  | 0.08               | 0.22 <sup>b</sup>  | 0.11               | -0.17 <sup>a</sup> | 0.01               | -0.06              | -0.18 <sup>a</sup> | -0.18 <sup>a</sup> | -0.21 <sup>b</sup> | -0.15              | 0.21 <sup>a</sup>  | 0.06              | 0.72 <sup>c</sup>  | -0.23 <sup>b</sup> | -0.09             | 0.21 <sup>a</sup> |
| LVDL-p      | 0.47 <sup>c</sup>  | 0.54 <sup>c</sup>  | 1                  | 0.76 <sup>c</sup>  | 0.04              | 0.35 <sup>c</sup>  | 0.18 <sup>a</sup>  | -0.35 <sup>c</sup> | 0.22 <sup>b</sup>  | 0.32 <sup>c</sup>  | 0.09               | 0.09               | 0.24 <sup>b</sup>  | -0.02              | -0.08              | -0.22 <sup>b</sup> | -0.15              | -0.35 <sup>c</sup> | -0.35 <sup>c</sup> | -0.08              | 0.23 <sup>b</sup>  | 0.2 <sup>a</sup>  | 0.81 <sup>c</sup>  | -0.32 <sup>c</sup> | 0.06              | 0.25 <sup>b</sup> |
| MVDL-p      | 0.57 <sup>c</sup>  | 0.39 <sup>c</sup>  | 0.76 <sup>c</sup>  | 1                  | 0.31 <sup>c</sup> | 0.21 <sup>b</sup>  | 0.29 <sup>c</sup>  | -0.29 <sup>c</sup> | 0.34 <sup>c</sup>  | 0.29 <sup>c</sup>  | 0.22               | 0.26 <sup>c</sup>  | 0.3 <sup>c</sup>   | -0.12              | -0.02              | -0.15              | -0.15              | -0.37 <sup>c</sup> | -0.32 <sup>c</sup> | -0.14              | 0.38 <sup>c</sup>  | 0.34 <sup>c</sup> | 0.76 <sup>c</sup>  | -0.22 <sup>b</sup> | 0.21 <sup>b</sup> | 0.35 <sup>c</sup> |
| SVLVDL-p    | 0.59 <sup>c</sup>  | -0.11 <sup>a</sup> | 0.04               | 0.31 <sup>c</sup>  | 1                 | -0.16              | 0.6 <sup>c</sup>   | 0.45 <sup>c</sup>  | 0.46 <sup>c</sup>  | -0.01              | 0.21 <sup>a</sup>  | 0.03               | 0.28 <sup>c</sup>  | 0.13               | -0.14              | -0.11              | 0.14               | -0.3 <sup>c</sup>  | -0.08              | 0.01               | 0.23 <sup>b</sup>  | 0.67 <sup>c</sup> | 0.22 <sup>b</sup>  | 0.01               | 0.71 <sup>c</sup> | 0.58 <sup>c</sup> |
| VSVLVDL-p   | 0.69 <sup>c</sup>  | 0.17 <sup>a</sup>  | 0.65 <sup>c</sup>  | 0.21 <sup>b</sup>  | -0.16             | 1                  | 0.12               | -0.04              | 0.08               | 0.14               | -0.28 <sup>c</sup> | -0.27 <sup>c</sup> | -0.15              | 0.18 <sup>a</sup>  | -0.12              | -0.22 <sup>b</sup> | 0.05               | -0.15              | -0.15              | 0.08               | -0.27 <sup>c</sup> | 0.14              | 0.37 <sup>c</sup>  | -0.26 <sup>c</sup> | 0.12              | 0.2               |
| LDL-p       | 0.53 <sup>c</sup>  | 0.05               | 0.18 <sup>a</sup>  | 0.29 <sup>c</sup>  | 0.6 <sup>c</sup>  | 0.12               | 1                  | 0.42 <sup>c</sup>  | 0.75 <sup>c</sup>  | 0.31 <sup>c</sup>  | 0.3 <sup>c</sup>   | 0.12               | 0.31 <sup>c</sup>  | 0.15               | -0.03              | -0.01              | -0.02              | -0.28 <sup>c</sup> | -0.12              | 0.12               | 0.3 <sup>c</sup>   | 0.9 <sup>c</sup>  | 0.35 <sup>c</sup>  | 0.07               | 0.92 <sup>c</sup> | 0.95 <sup>c</sup> |
| LLDL-p      | 0.19 <sup>a</sup>  | 0.32 <sup>c</sup>  | 0.35 <sup>c</sup>  | -0.29 <sup>c</sup> | 0.45 <sup>c</sup> | -0.04              | 0.42 <sup>c</sup>  | 1                  | 0.09               | -0.32 <sup>c</sup> | 0.01               | -0.17 <sup>a</sup> | -0.1               | 0.19 <sup>a</sup>  | 0.06               | 0.05               | 0.32 <sup>c</sup>  | 0.15               | 0.3 <sup>c</sup>   | 0.23 <sup>b</sup>  | -0.17 <sup>a</sup> | 0.52 <sup>c</sup> | -0.28 <sup>c</sup> | 0.32 <sup>c</sup>  | 0.61 <sup>c</sup> | 0.4 <sup>c</sup>  |
| MLDL-p      | 0.42 <sup>c</sup>  | 0.07               | 0.22 <sup>b</sup>  | 0.34 <sup>c</sup>  | 0.46 <sup>c</sup> | 0.08               | 0.75 <sup>c</sup>  | 0.09               | 1                  | -0.15              | 0.41 <sup>c</sup>  | 0.17 <sup>a</sup>  | 0.49 <sup>c</sup>  | -0.04              | 0.08               | 0.02               | -0.17 <sup>a</sup> | -0.22 <sup>b</sup> | -0.18 <sup>a</sup> | 0.03               | 0.46 <sup>c</sup>  | 0.71 <sup>c</sup> | 0.33 <sup>c</sup>  | 0.12               | 0.68 <sup>c</sup> | 0.7 <sup>c</sup>  |
| SLDL-p      | 0.17 <sup>a</sup>  | 0.29 <sup>c</sup>  | 0.32 <sup>c</sup>  | 0.29 <sup>c</sup>  | -0.01             | 0.14               | 0.31 <sup>c</sup>  | -0.32 <sup>c</sup> | -0.15              | 1                  | -0.04              | 0.14               | -0.04              | 0.12               | -0.21 <sup>b</sup> | -0.09              | -0.1               | -0.33 <sup>c</sup> | -0.23 <sup>b</sup> | -0.05              | 0.05               | 0.09              | 0.39 <sup>c</sup>  | -0.32 <sup>c</sup> | 0.08              | 0.3 <sup>c</sup>  |
| HDL-p       | -0.02              | 0.08               | 0.09               | 0.22 <sup>b</sup>  | 0.21 <sup>a</sup> | -0.28 <sup>c</sup> | 0.3 <sup>c</sup>   | 0.01               | 0.41 <sup>c</sup>  | -0.04              | 1                  | 0.6 <sup>c</sup>   | 0.71 <sup>c</sup>  | -0.1               | 0.38 <sup>c</sup>  | 0.33 <sup>c</sup>  | -0.02              | 0.01               | 0.18 <sup>a</sup>  | 0.21 <sup>b</sup>  | 0.88 <sup>c</sup>  | 0.48 <sup>c</sup> | 0.07               | 0.64 <sup>c</sup>  | 0.32 <sup>c</sup> | 0.26 <sup>b</sup> |
| HDL-p H1    | -0.12              | 0.22 <sup>b</sup>  | 0.09               | 0.26 <sup>c</sup>  | 0.03              | -0.27 <sup>c</sup> | 0.12               | -0.17 <sup>a</sup> | 0.17 <sup>a</sup>  | 0.14               | 0.6 <sup>c</sup>   | 1                  | 0.13               | -0.4 <sup>c</sup>  | 0.16 <sup>c</sup>  | 0.45 <sup>c</sup>  | -0.16              | 0.06               | 0.18 <sup>a</sup>  | -0.26 <sup>c</sup> | 0.66 <sup>c</sup>  | 0.2 <sup>a</sup>  | 0.15               | 0.28 <sup>c</sup>  | 0.1               | 0.18 <sup>a</sup> |
| HDL-p H2    | 0.13               | 0.11               | 0.24 <sup>b</sup>  | 0.3 <sup>c</sup>   | 0.28 <sup>c</sup> | -0.15              | 0.3 <sup>c</sup>   | -0.1               | 0.49 <sup>c</sup>  | -0.04              | 0.71 <sup>c</sup>  | 0.13               | 1                  | -0.19 <sup>a</sup> | 0.17 <sup>a</sup>  | -0.08              | -0.2 <sup>b</sup>  | -0.3 <sup>c</sup>  | -0.29 <sup>c</sup> | -0.05              | 0.83 <sup>c</sup>  | 0.36 <sup>c</sup> | 0.21 <sup>b</sup>  | 0.16 <sup>c</sup>  | 0.29 <sup>c</sup> | 0.24 <sup>b</sup> |
| HDL-p H3    | 0.19 <sup>a</sup>  | -0.17 <sup>a</sup> | -0.02              | -0.12              | 0.13              | 0.18 <sup>a</sup>  | 0.15               | 0.19 <sup>a</sup>  | -0.04              | 0.12               | -0.1               | -0.4 <sup>c</sup>  | -0.19 <sup>a</sup> | 1                  | -0.37 <sup>c</sup> | -0.11              | 0.24 <sup>b</sup>  | -0.22 <sup>b</sup> | 0.02               | 0.67 <sup>c</sup>  | -0.37 <sup>c</sup> | 0.1               | -0.1               | -0.02              | 0.16 <sup>a</sup> | 0.07              |
| HDL-p H4    | -0.18 <sup>a</sup> | 0.01               | -0.08              | -0.02              | -0.14             | -0.12              | -0.029             | 0.06               | 0.08               | -0.21 <sup>b</sup> | 0.38 <sup>c</sup>  | 0.16 <sup>c</sup>  | 0.17 <sup>a</sup>  | -0.37 <sup>c</sup> | 1                  | 0.02               | -0.18 <sup>a</sup> | 0.22 <sup>b</sup>  | -0.03              | 0.45 <sup>c</sup>  | 0.22 <sup>b</sup>  | 0.09              | -0.08              | 0.47 <sup>c</sup>  | -0.03             | -0.04             |
| HDL-p H5    | -0.27 <sup>c</sup> | -0.06              | -0.22 <sup>b</sup> | -0.15              | -0.11             | -0.22 <sup>b</sup> | -0.01              | 0.05               | 0.02               | -0.9               | 0.33 <sup>c</sup>  | 0.45 <sup>c</sup>  | -0.08              | -0.11              | 0.02               | 1                  | -0.18 <sup>a</sup> | 0.37 <sup>c</sup>  | 0.6 <sup>c</sup>   | -0.09              | 0.19 <sup>a</sup>  | 0.09              | -0.19 <sup>a</sup> | 0.48 <sup>c</sup>  | 0.01              | -0.01             |
| HDL-p H6    | 0.09               | -0.18 <sup>a</sup> | -0.15              | -0.15              | 0.14              | 0.05               | -0.02              | 0.32 <sup>c</sup>  | -0.17 <sup>a</sup> | -0.1               | -0.02              | -0.16              | -0.2 <sup>a</sup>  | 0.24 <sup>b</sup>  | -0.18 <sup>a</sup> | -0.18 <sup>a</sup> | 1                  | 0.15               | 0.61 <sup>c</sup>  | 0.09               | -0.24 <sup>b</sup> | 0.12              | -0.15              | 0.37 <sup>c</sup>  | 0.06              | -0.06             |
| HDL-p H7    | -0.38 <sup>c</sup> | -0.18 <sup>a</sup> | -0.35 <sup>c</sup> | -0.37 <sup>c</sup> | -0.3 <sup>c</sup> | -0.15              | -0.28 <sup>c</sup> | 0.15               | -0.22 <sup>b</sup> | -0.33 <sup>c</sup> | 0.01               | 0.06               | -0.3 <sup>c</sup>  | -0.22 <sup>b</sup> | 0.22 <sup>b</sup>  | 0.37 <sup>c</sup>  | 0.15               | 1                  | 0.67 <sup>c</sup>  | -0.03              | -0.19 <sup>a</sup> | -0.63             | -0.43 <sup>c</sup> | 0.56 <sup>c</sup>  | -0.12             | -0.2 <sup>a</sup> |
| LHDL-p      | 0.19 <sup>a</sup>  | 0.21 <sup>b</sup>  | 0.35 <sup>c</sup>  | -0.32 <sup>c</sup> | -0.08             | -0.15              | -0.12              | 0.3 <sup>c</sup>   | -0.18 <sup>a</sup> | -0.23 <sup>f</sup> | 0.18 <sup>a</sup>  | 0.66 <sup>c</sup>  | -0.29 <sup>c</sup> | 0.02               | -0.03              | 0.6 <sup>c</sup>   | 0.61 <sup>c</sup>  | 0.67 <sup>c</sup>  | 1                  | -0.01              | -0.12              | 0.11              | -0.36 <sup>c</sup> | 0.73 <sup>c</sup>  | 0.01              | -0.12             |
| MHDl-p      | 0.42 <sup>c</sup>  | -0.15              | -0.08              | -0.14 <sup>a</sup> | 0.01              | 0.08               | 0.12               | 0.26 <sup>b</sup>  | 0.03               | -0.05              | 0.21 <sup>b</sup>  | -0.26 <sup>c</sup> | -0.05              | 0.67 <sup>c</sup>  | 0.45 <sup>c</sup>  | -0.09              | 0.09               | -0.03              | -0.01              | 1                  | -0.18 <sup>a</sup> | 0.17 <sup>a</sup> | -0.16              | 0.36 <sup>c</sup>  | 0.13              | 0.04              |
| SHDL-p      | 0.17 <sup>a</sup>  | 0.21 <sup>a</sup>  | 0.23 <sup>b</sup>  | 0.38 <sup>c</sup>  | 0.23 <sup>b</sup> | -0.27 <sup>c</sup> | 0.3 <sup>c</sup>   | -0.17 <sup>a</sup> | 0.46 <sup>c</sup>  | 0.05               | 0.88 <sup>c</sup>  | 0.18 <sup>a</sup>  | 0.83 <sup>c</sup>  | -0.37 <sup>c</sup> | 0.22 <sup>b</sup>  | 0.19 <sup>a</sup>  | -0.24 <sup>b</sup> | -0.19 <sup>a</sup> | -0.12              | -0.18 <sup>a</sup> | 1                  | 0.38 <sup>c</sup> | 0.25 <sup>b</sup>  | 0.28 <sup>c</sup>  | 0.28 <sup>c</sup> | 0.28 <sup>c</sup> |
| TC          | 0.6 <sup>c</sup>   | 0.06               | 0.2 <sup>a</sup>   | 0.34 <sup>c</sup>  | 0.67 <sup>c</sup> | 0.14               | 0.89 <sup>c</sup>  | 0.52 <sup>c</sup>  | 0.71 <sup>c</sup>  | 0.09               | 0.48 <sup>c</sup>  | 0.2 <sup>a</sup>   | 0.36 <sup>c</sup>  | 0.1                | 0.09               | 0.09               | 0.12               | -0.63              | 0.11               | 0.17 <sup>a</sup>  | 0.38 <sup>c</sup>  | 1                 | 0.35 <sup>c</sup>  | 0.34 <sup>c</sup>  | 0.95 <sup>c</sup> | 0.91 <sup>c</sup> |
| TG          | 0.59 <sup>c</sup>  | 0.72 <sup>c</sup>  | 0.81 <sup>c</sup>  | 0.76 <sup>c</sup>  | 0.22 <sup>b</sup> | 0.37               | 0.35 <sup>c</sup>  | -0.28 <sup>c</sup> | 0.33 <sup>c</sup>  | 0.39 <sup>c</sup>  | 0.07               | 0.15               | 0.21 <sup>b</sup>  | -0.1               | -0.08              | -0.19 <sup>a</sup> | -0.15              | -0.43 <sup>c</sup> | -0.36 <sup>c</sup> | -0.16              | 0.25 <sup>b</sup>  | 0.35 <sup>c</sup> | 1                  | -0.35 <sup>c</sup> | 0.19 <sup>a</sup> | 0.5 <sup>c</sup>  |
| HDL-C       | -0.25 <sup>b</sup> | 0.23 <sup>b</sup>  | -0.32 <sup>c</sup> | -0.22 <sup>b</sup> | 0.01              | -0.26 <sup>c</sup> | 0.07               | 0.32 <sup>c</sup>  | 0.12               | -0.32 <sup>c</sup> | 0.64 <sup>c</sup>  | 0.28 <sup>c</sup>  | 0.16 <sup>a</sup>  | -0.02              | 0.47 <sup>c</sup>  | 0.48 <sup>c</sup>  | 0.37 <sup>c</sup>  | 0.56 <sup>c</sup>  | 0.73 <sup>c</sup>  | 0.36 <sup>c</sup>  | 0.28 <sup>c</sup>  | 0.34 <sup>c</sup> | -0.35 <sup>c</sup> | 1                  | 0.18 <sup>a</sup> | 0.03              |
| LDL-C       | 0.59 <sup>c</sup>  | -0.09              | 0.06               | 0.21 <sup>b</sup>  | 0.71 <sup>c</sup> | 0.12               | 0.92 <sup>c</sup>  | 0.61 <sup>c</sup>  | 0.68 <sup>c</sup>  | 0.08               | 0.32 <sup>c</sup>  | 0.1                | 0.29 <sup>c</sup>  | 0.16 <sup>a</sup>  | -0.03              | 0.01               | 0.06               | -0.12              | 0.01               | 0.13               | 0.28 <sup>c</sup>  | 0.95 <sup>c</sup> | 0.19 <sup>a</sup>  | 0.18 <sup>a</sup>  | 1                 | 0.89 <sup>c</sup> |
| apoB        | 0.6 <sup>c</sup>   | 0.21 <sup>a</sup>  | 0.25 <sup>b</sup>  | 0.35 <sup>c</sup>  | 0.58 <sup>c</sup> | 0.2 <sup>a</sup>   | 0.95 <sup>c</sup>  | 0.4 <sup>c</sup>   | 0.7 <sup>c</sup>   | 0.3 <sup>c</sup>   | 0.26 <sup>b</sup>  | 0.18 <sup>a</sup>  | 0.24 <sup>b</sup>  | 0.07               | -0.04              | -0.01              | -0.06              | -0.2 <sup>a</sup>  | -0.12              | 0.04               | 0.25 <sup>c</sup>  | 0.91 <sup>c</sup> | 0.5 <sup>c</sup>   | 0.03               | 0.89 <sup>c</sup> | 1                 |

## Supplemental Table S3

**Title:** Compared parameters and units of the corresponding parameters

(C= cholesterol. HDL= high density lipoproteins. l= liter. LDL= low density lipoproteins. mg/dl= milligram per deciliter.  $\mu\text{mol/l}$ = micromoles per liter. nmol/l= nanomoles per liter. NMR= nuclear magnetic resonance spectroscopy. p= particles. TC= total cholesterol. TG= triglycerides. VLDL= very low density lipoproteins)

| <i><b>Lipoprofile (NMR)</b></i> | <i><b>Lipofit (NMR)</b></i> | <i><b>Standard method (Ultracentrifugation)</b></i> | <i><b>Unit</b></i> |
|---------------------------------|-----------------------------|-----------------------------------------------------|--------------------|
| TC                              | TC                          | TC                                                  | mg/dl              |
| TG                              | TG                          | TG                                                  | mg/dl              |
| HDL-C                           | HDL-C                       | HDL-C                                               | mg/dl              |
| LDL-C                           | LDL-C                       | LDL-C                                               | mg/dl              |
| Large + very large VLDL         | Large VLDL                  | No value                                            | nmol/l             |
| LDL-p                           | LDL-p                       | No value                                            | nmol/l             |
| Small + medium LDL-p            | Small LDL-p                 | No value                                            | nmol/l             |
| Large LDL-p                     | Large LDL-p                 | No value                                            | nmol/l             |
| HDL-p                           | HDL-p                       | No value                                            | $\mu\text{mol/l}$  |
| HDL-p (H4-H7)                   | Large HDL-p                 | No value                                            | $\mu\text{mol/l}$  |
| HDL-p (H1-H3)                   | Small HDL-p                 | No value                                            | $\mu\text{mol/l}$  |

## Supplemental Table S4

**Title:** NMR values compared due to their size

(HDL= high density lipoproteins. l= liter. LDL= low density lipoproteins.  $\mu\text{mol/l}$ = micromoles per liter.  $\text{nmol/l}$ = nanomoles per liter. p= particles. VLDL= very low density lipoproteins)

| <i>Lipoprofile (Sub)Class</i>   | <i>Lipoprofile size (nm)</i> | <i>Lipofit (Sub)Class</i>  | <i>Lipofit size (nm)</i> |
|---------------------------------|------------------------------|----------------------------|--------------------------|
| <b><i>Total VLDL-p</i></b>      | 24-240                       |                            |                          |
| <b><i>Very large VLDL-p</i></b> | 90-240                       | <b><i>Large VLDL-p</i></b> | 60-200                   |
| <b><i>Large VLDL-p</i></b>      | 50-89                        |                            |                          |
| <b><i>Medium VLDL-p</i></b>     | 37-49                        |                            |                          |
| <b><i>Small VLDL-p</i></b>      | 30-36                        |                            |                          |
| <b><i>Very small VLDL-p</i></b> | 24-29                        |                            |                          |
| <b><i>Total LDL-p</i></b>       | 19-23                        | <b><i>Total LDL-p</i></b>  | 18-23                    |
| <b><i>Large LDL-p</i></b>       | 21.5-23                      | <b><i>Large LDL-p</i></b>  | 21.2-23                  |
| <b><i>Medium LDL-p</i></b>      | 20.5-21.4                    | <b><i>Small LDL-p</i></b>  | 18-21.2                  |
| <b><i>Small LDL-p</i></b>       | 19-20.4                      |                            |                          |
| <b><i>Total HDL-p</i></b>       | 7.4-13                       | <b><i>Total HDL-p</i></b>  | 7.3-13                   |
| <b><i>Large HDL-p</i></b>       | 9.6-13                       | <b><i>Large HDL-p</i></b>  | 8.8-13                   |
| <i>H7-p</i>                     | 12                           |                            |                          |
| <i>H6-p</i>                     | 10.8                         |                            |                          |
| <i>H5-p</i>                     | 10.3                         |                            |                          |
| <i>H4-p</i>                     | 9.5                          |                            |                          |
| <b><i>Medium HDL-p</i></b>      | 8.1-9.5                      | <b><i>Small HDL-p</i></b>  | 7.3-8.8                  |
| <i>H3-p</i>                     | 8.7                          |                            |                          |
| <b><i>Small HDL-p</i></b>       | 7.4-8                        |                            |                          |
| <i>H2-p</i>                     | 7.8                          |                            |                          |
| <i>H1-p</i>                     | 7.4                          |                            |                          |

## Supplemental Table S5

**Title:** Comparison of standard lipids between  $\beta$ -quantification and the lipofit and lipoprofile methods

(C= cholesterol. CI= confidence interval. HDL= high density lipoproteins. MD= mean difference. LDL= low density lipoproteins. LoA= limit of agreement. TC= total cholesterol. TG= triglycerides)

| <i>Parameter</i>    | <i>Lipoprofile</i>   |                       |                        | <i>Lipofit</i>        |                       |                       |
|---------------------|----------------------|-----------------------|------------------------|-----------------------|-----------------------|-----------------------|
|                     | <i>r-correlation</i> | <i>Passing Bablok</i> | <i>Bland Altman</i>    | <i>r- correlation</i> | <i>Passing Bablok</i> | <i>Bland Altman</i>   |
|                     |                      | <i>Slope (95%CI)</i>  | <i>MD (95%CI)</i>      |                       | <i>Slope (95%CI)</i>  | <i>MD (95%CI)</i>     |
| <b><i>TC</i></b>    | 0.964                | 0.889 (0.861 – 0.921) | - 8.2 (-10.5 – -5.91)  | 0.947                 | 0.914 (0.864 – 0.963) | -4.56 (-7.21 – -1.91) |
| <b><i>TG</i></b>    | 0.979                | 1.027 (1.000 – 1.045) | 2.58 (-0.184 – 5.34)   | 0.961                 | 0.983 (0.924 – 1.046) | 3.19 (-0.571 – 6.94)  |
| <b><i>LDL-C</i></b> | 0.941                | 0.960 (0.921 – 1.000) | -4.65 (-6.76 – -2.55)  | 0.935                 | 0.973 (0.909 – 1.034) | -3.25 (-5.47 – -1.03) |
| <b><i>HDL-C</i></b> | 0.837                | 0.830 (0.756 – 0.897) | -0.593 (-2.18 – 0.991) | 0.805                 | 0.786 (0.700 – 0.885) | 2.79 (1.07 – 4.5)     |

## Supplemental Table S6

**Title:** Comparison between the lipofit and lipoprofile methods

<sup>a</sup> compared with LabCorp large + very large VLDL-p. <sup>b</sup> compared with LabCorp small + medium LDL-p. <sup>c</sup> compared with LabCorp H4-H7 HDL-p. <sup>d</sup> compared with LabCorp H1-H3 HDL-p. C= cholesterol. HDL= high density lipoproteins. LDL= low density lipoproteins. LHDL= large high density lipoproteins. LLDL= large low density lipoproteins. LVLDL= large very low density lipoproteins. MD= mean difference. p= particles. SHDL= small high density lipoproteins. SLDL= small low density lipoproteins. TC= total cholesterol. TG= triglycerides)

| <i>Parameter</i>           | <i>r-correlation</i> | <i>Passing Bablok regression</i> |               | <i>Bland Altman analysis</i> |               |
|----------------------------|----------------------|----------------------------------|---------------|------------------------------|---------------|
|                            |                      | <i>slope</i>                     | <i>95% CI</i> | <i>MD</i>                    | <i>95% CI</i> |
| <b>TC</b>                  | 0.950                | 1.026                            | 0.966 – 1.082 | 3.6                          | 1.3 – 5.94    |
| <b>TG</b>                  | 0.964                | 0.988                            | 0.932 – 1.050 | 0.6                          | -2.87 – 4.08  |
| <b>LDL-C</b>               | 0.953                | 1.000                            | 0.946 – 1.067 | 1.4                          | -0.46 – 3.26  |
| <b>HDL-C</b>               | 0.921                | 0.958                            | 0.889 – 1.000 | 3.4                          | 2.55 – 4.21   |
| <b>LVLDL-p<sup>a</sup></b> | 0.898                | 0.980                            | 0.865 – 1.157 | 1.52                         | 1.1 – 1.94    |
| <b>LDL-p</b>               | 0.908                | 1.057                            | 0.984 – 1.138 | -153.8                       | -185 – -122   |
| <b>LLDL-p</b>              | 0.607                | 1.272                            | 1.077 – 1.468 | 299.6                        | 261 – 338     |
| <b>SLDL-p<sup>b</sup></b>  | 0.789                | 0.593                            | 0.519 – 0.668 | -431                         | -472 – -389   |
| <b>LDL-size</b>            | 0.677                | 0.860                            | 0.738–1.002   | -0.001                       | -0.05–0.048   |
| <b>HDL-p</b>               | 0.934                | 1.637                            | 1.532 – 1.770 | 14.8                         | 14.22 – 15.3  |
| <b>LHDL-p<sup>c</sup></b>  | 0.869                | 1.722                            | 1.540 – 1.903 | 1.72                         | 1.41 – 2.03   |
| <b>SHDL-p<sup>d</sup></b>  | 0.735                | 1.817                            | 1.642 – 2.058 | 12.8                         | 11.9 – 13.7   |
| <b>HDL-size</b>            | 0.843                | 1.014                            | 0.916–1.099   | -0.13                        | -0.175–0.086  |

## Supplemental Figure S1

**Title:** Comparison of standard lipids between  $\beta$ -quantification and NMR (Bland Altman plots)

(dashed line = limits of agreement, continuous horizontal line = mean difference; C= cholesterol. HDL= high density lipoproteins. LDL= low density lipoproteins. TC= total cholesterol. TG= triglycerides)

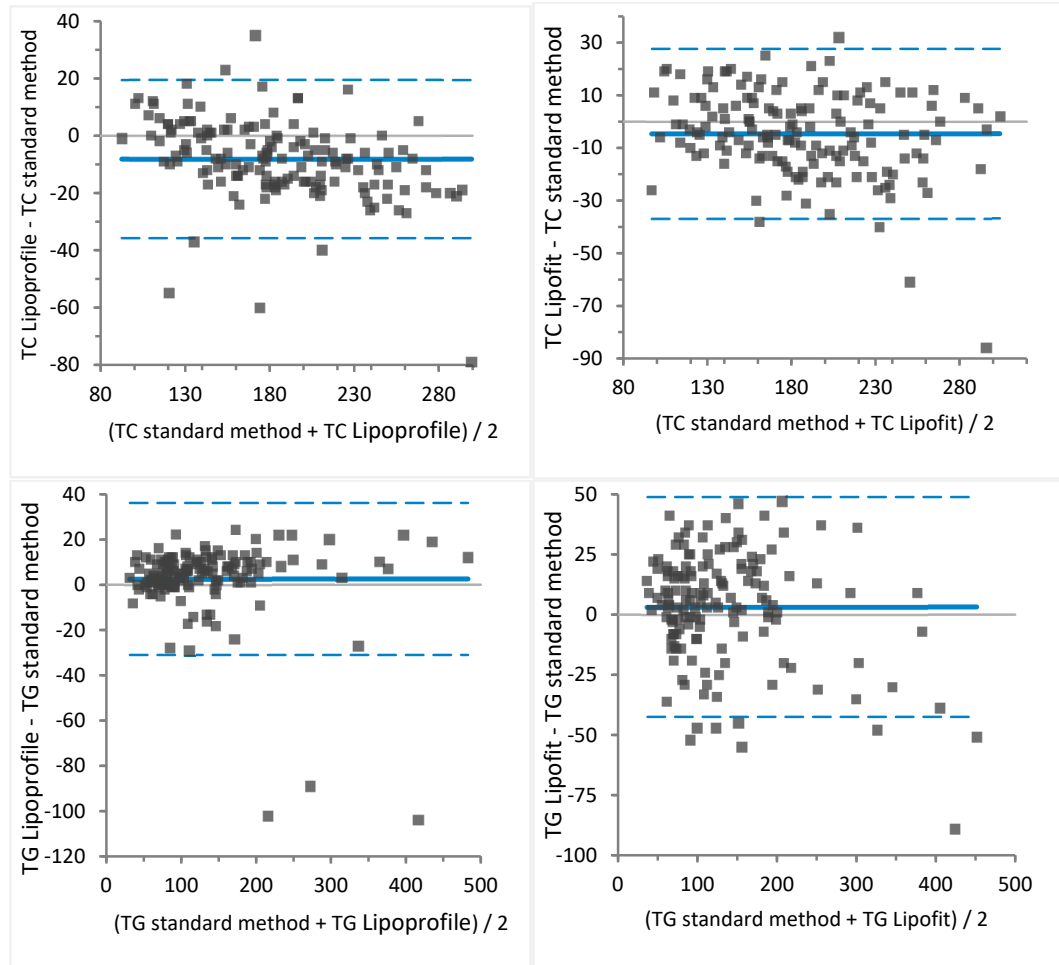



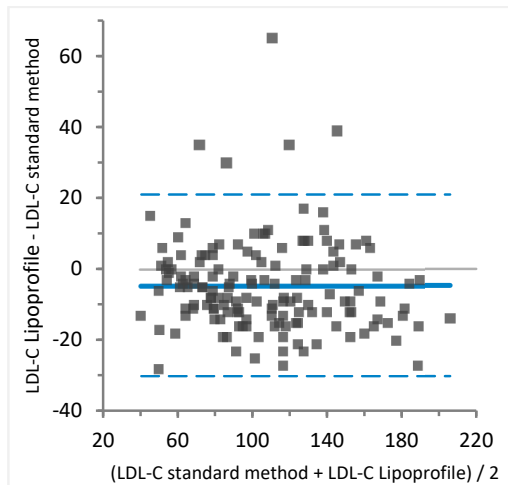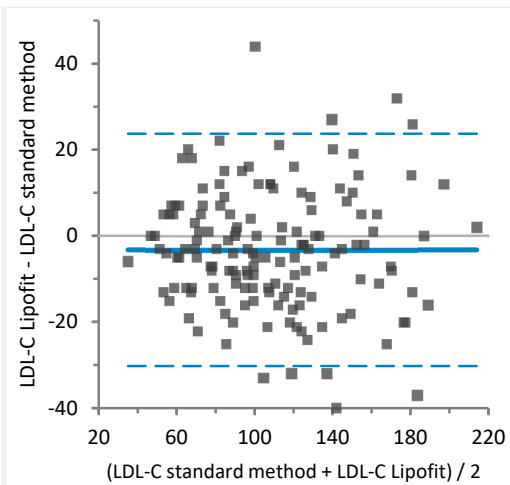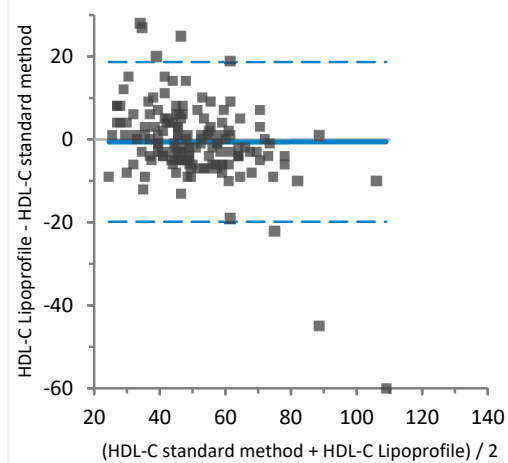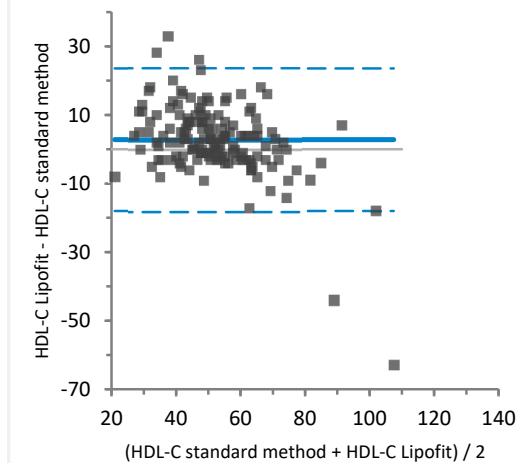

## Supplemental Figure S2

**Title:** Comparison of lipoprotein particles between the lipoprofile and lipofit methods (Bland Altman plots)

(dashed line = limits of agreement, continuous horizontal line = mean difference; HDL= high density lipoproteins. LDL= low density lipoproteins. p= particles. VLDL= very low density lipoproteins)

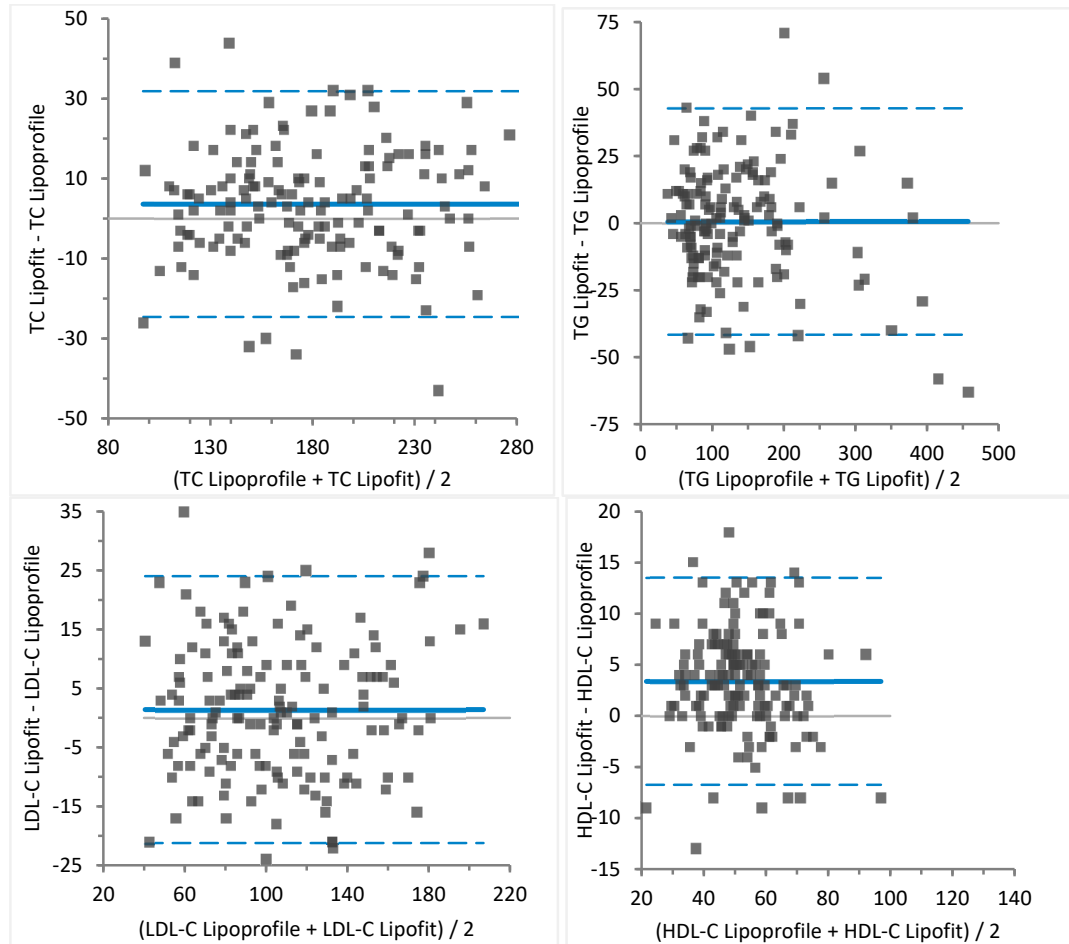

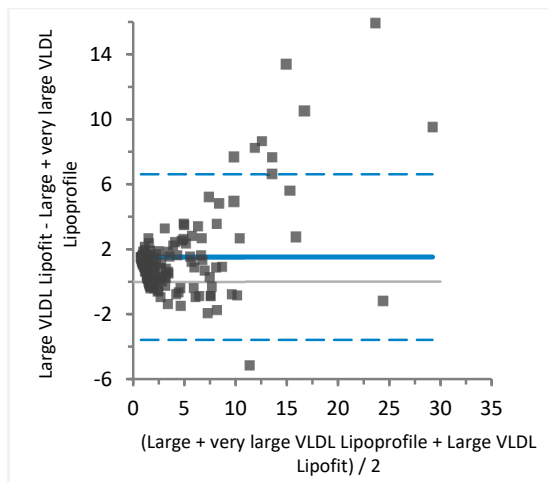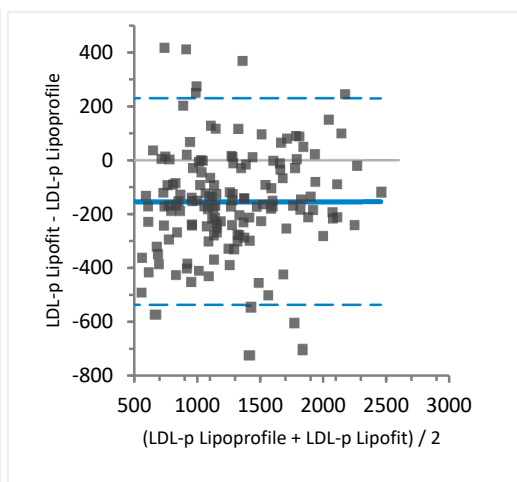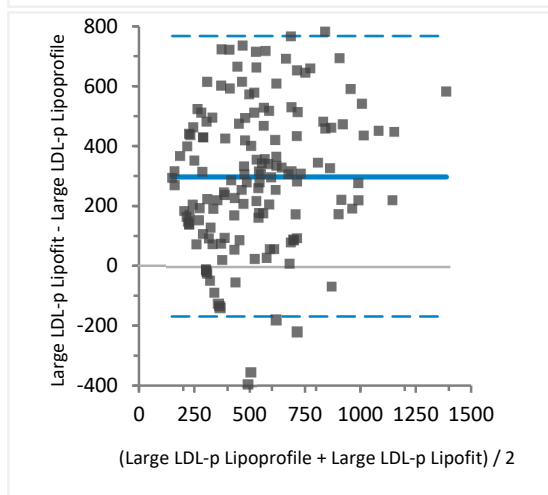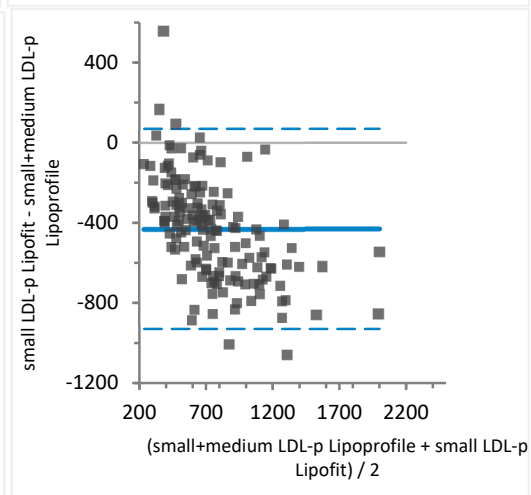

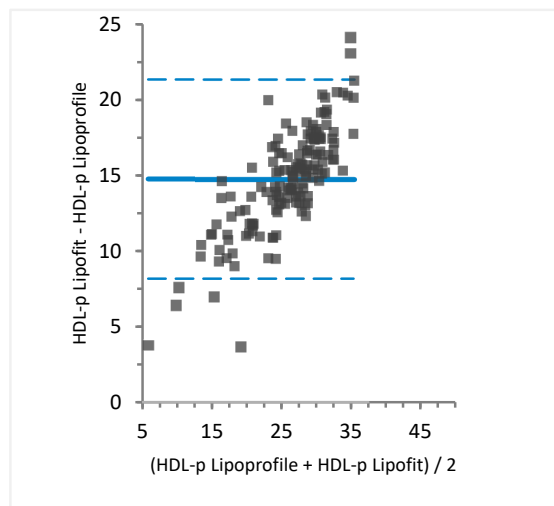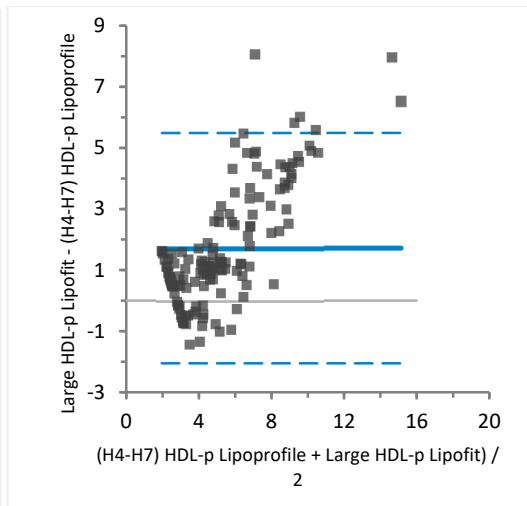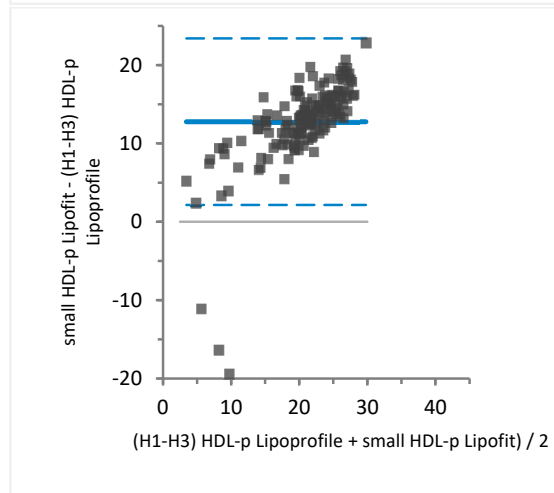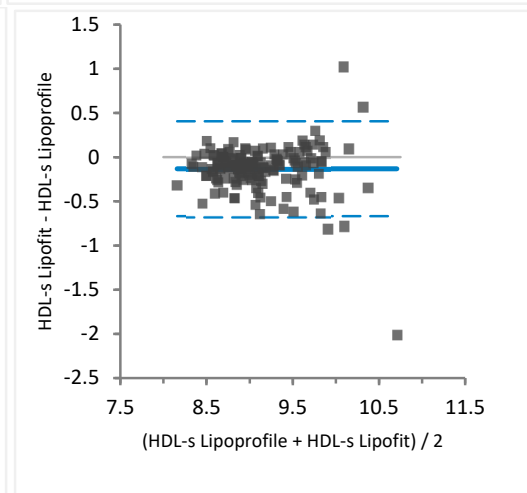

## Supplemental Figure S3

**Title:** Comparison of standard lipids between the lipoprofile and lipofit methods

The figures show the Passing-Bablok regression for total cholesterol (top left), triglycerides (top right), low density lipoprotein cholesterol (bottom left), and high density lipoprotein cholesterol (bottom right). The respective slopes of the regression lines (red) were 1.026 (TC), 0.988 (TG), 1.000 (LDL-C), and 0.958 (HDL-C), respectively. The grey line represents the line of identity.

(C= cholesterol. HDL= high density lipoproteins. LDL= low density lipoproteins. TC= total cholesterol. TG= triglycerides)

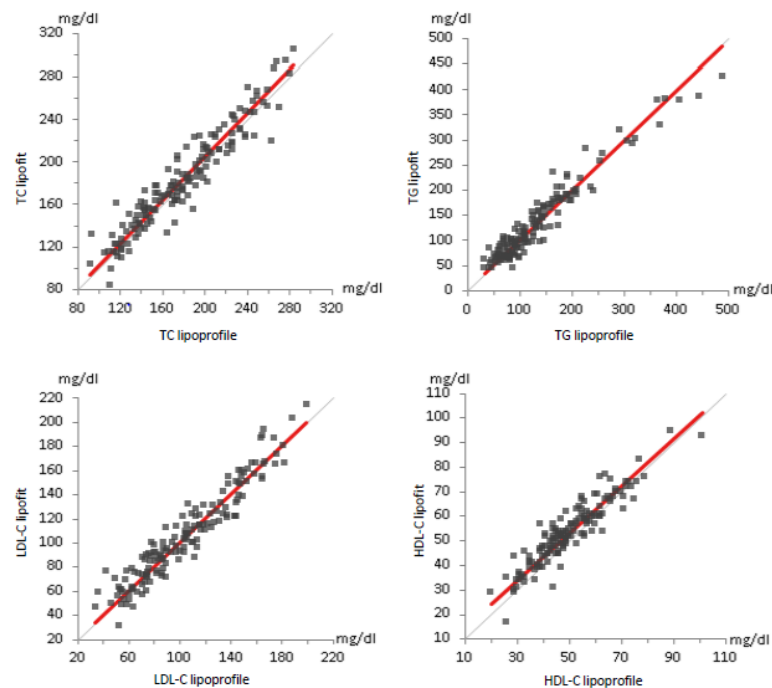

Supplement: s1 [file s1]
